# Supplementary material for: Why We Need More Nature at Work: Effects of Natural Elements and Sunlight on Employee Mental Health and Work Attitudes
Source: PubMed Central journal article supplement (PMC4877070; doi:10.1371/journal.pone.0155614), 2016-05-23
Supplement: pone.0155614.s001.pdf [file pone.0155614.s001.pdf]

Scale 1. Exposure to Natural elements.

Instruction: Please respond to the following statements about your workplace:

| Natural elements exposure                                                                                  | Strongly disagree        | Disagree                 | Neither agree nor disagree | Agree                    | Strongly agree           |
|------------------------------------------------------------------------------------------------------------|--------------------------|--------------------------|----------------------------|--------------------------|--------------------------|
| 1. There are potted plants in my workspace.                                                                | <input type="checkbox"/> | <input type="checkbox"/> | <input type="checkbox"/>   | <input type="checkbox"/> | <input type="checkbox"/> |
| 2. I am exposed to depictions of nature (paintings, photographs) at my workspace                           | <input type="checkbox"/> | <input type="checkbox"/> | <input type="checkbox"/>   | <input type="checkbox"/> | <input type="checkbox"/> |
| 3. I view pictures of greenery on my computer (screensaver, saved pictures).                               | <input type="checkbox"/> | <input type="checkbox"/> | <input type="checkbox"/>   | <input type="checkbox"/> | <input type="checkbox"/> |
| 4. There are images of greenery (realistic photographs, paintings) in my workspace.                        | <input type="checkbox"/> | <input type="checkbox"/> | <input type="checkbox"/>   | <input type="checkbox"/> | <input type="checkbox"/> |
| 5. I look at realistic images of greenery at work (realistic photographs, paintings).                      | <input type="checkbox"/> | <input type="checkbox"/> | <input type="checkbox"/>   | <input type="checkbox"/> | <input type="checkbox"/> |
| 6. There are enough realistic depictions of greenery (photographs or realistic paintings) in my workspace. | <input type="checkbox"/> | <input type="checkbox"/> | <input type="checkbox"/>   | <input type="checkbox"/> | <input type="checkbox"/> |
| 7. Overall, I am satisfied with the amount of greenery I am exposed to in my workspace.                    | <input type="checkbox"/> | <input type="checkbox"/> | <input type="checkbox"/>   | <input type="checkbox"/> | <input type="checkbox"/> |
| 8. There are windows at my workspace with views of greenery (trees, plants, flowers).                      | <input type="checkbox"/> | <input type="checkbox"/> | <input type="checkbox"/>   | <input type="checkbox"/> | <input type="checkbox"/> |
| 9. In general, my workspace features enough greenery.                                                      | <input type="checkbox"/> | <input type="checkbox"/> | <input type="checkbox"/>   | <input type="checkbox"/> | <input type="checkbox"/> |
