# Supplementary material for: Why We Need More Nature at Work: Effects of Natural Elements and Sunlight on Employee Mental Health and Work Attitudes
Source: PubMed Central journal article supplement (PMC4877070; doi:10.1371/journal.pone.0155614), 2016-05-23
Supplement: pone.0155614.s002.pdf [file pone.0155614.s002.pdf]

Scale. Exposure to Sunlight.

Instruction: Please respond to the following statements about your workplace:

| Sunlight exposure                                                                                           | Strongly disagree        | Disagree                 | Neither agree nor disagree | Agree                    | Strongly agree           |
|-------------------------------------------------------------------------------------------------------------|--------------------------|--------------------------|----------------------------|--------------------------|--------------------------|
| 1. I am exposed to sunlight through windows in my workspace.                                                | <input type="checkbox"/> | <input type="checkbox"/> | <input type="checkbox"/>   | <input type="checkbox"/> | <input type="checkbox"/> |
| 2. Overall, I am satisfied with the amount of sunlight exposure I get at work.                              | <input type="checkbox"/> | <input type="checkbox"/> | <input type="checkbox"/>   | <input type="checkbox"/> | <input type="checkbox"/> |
| 3. I have control over how much sunlight comes into my workspace (control over windows, blinds, skylights). | <input type="checkbox"/> | <input type="checkbox"/> | <input type="checkbox"/>   | <input type="checkbox"/> | <input type="checkbox"/> |
| 4. There are windows that allow for natural sunlight to come into my workspace.                             | <input type="checkbox"/> | <input type="checkbox"/> | <input type="checkbox"/>   | <input type="checkbox"/> | <input type="checkbox"/> |
| 5. I get enough sun exposure while I am at work.                                                            | <input type="checkbox"/> | <input type="checkbox"/> | <input type="checkbox"/>   | <input type="checkbox"/> | <input type="checkbox"/> |
| 6. I am exposed to direct sunlight (from being outside) while at work.                                      | <input type="checkbox"/> | <input type="checkbox"/> | <input type="checkbox"/>   | <input type="checkbox"/> | <input type="checkbox"/> |
| 7. I have control over how often I can go outside and get direct sunlight exposure while I am at work.      | <input type="checkbox"/> | <input type="checkbox"/> | <input type="checkbox"/>   | <input type="checkbox"/> | <input type="checkbox"/> |
| 8. I make time to go outdoors and be in the sun while I am at work.                                         | <input type="checkbox"/> | <input type="checkbox"/> | <input type="checkbox"/>   | <input type="checkbox"/> | <input type="checkbox"/> |
